# Supplementary material
Source: PubMed Central journal article supplement (PMC8324540)
Supplement: NIHMS1707838-supplement-1.pdf [file NIHMS1707838-supplement-1.pdf]

Nuro-Gyina et al., Supplemental Figure 1

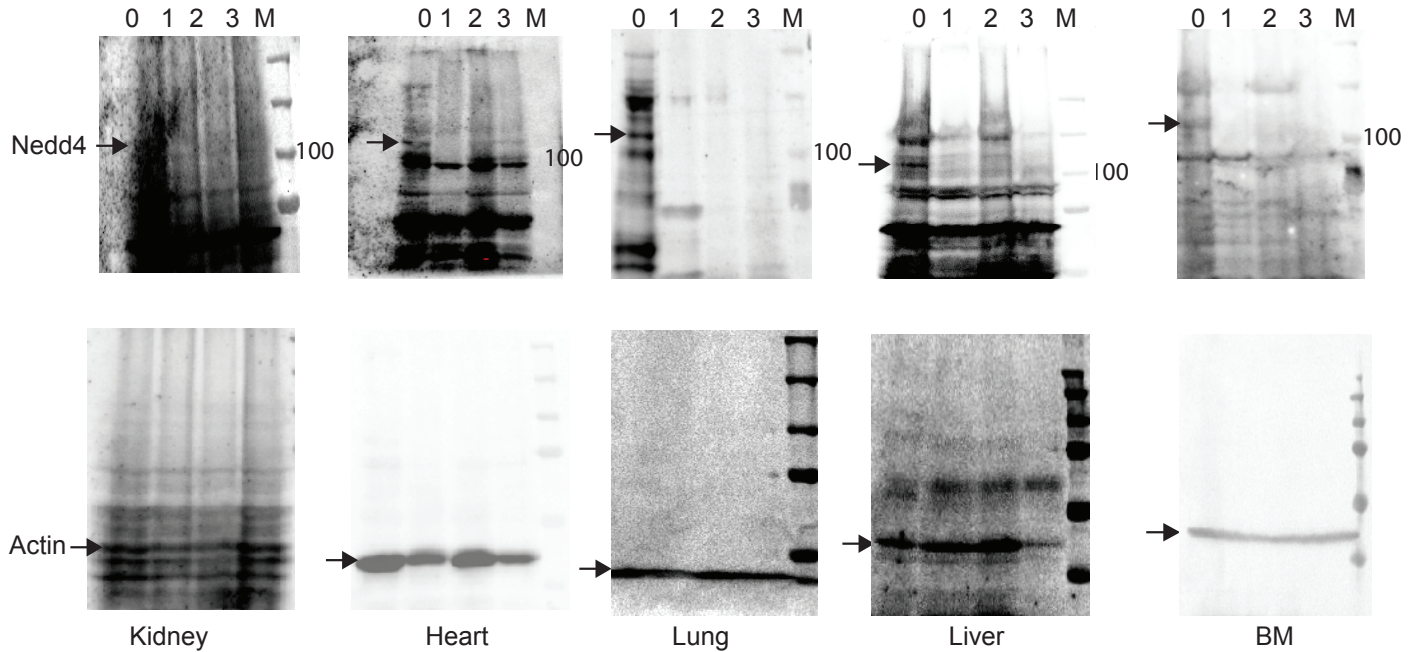

**Supplemental Figure 1: Original unmanipulated blots showing Nedd4 expression post-tamoxifen treatment:** Western blots of tissue homogenates from various organs from *Nedd4<sup>fl/fl</sup>ROSA<sup>CreER</sup>* mice pretreated with oil (0) or tamoxifen which were harvested 1, 2, or 3 weeks after the last tamoxifen injection. Top panel represent original blots indicating Nedd4 band (arrow sign) after probing with Nedd4 antibody; lower panel represents original blot indicating amount of actin (arrow sign) in corresponding sample. M represents protein ladder.
